# Supplementary material for: Recycling Co and Li from spent lithium-ion batteries using the silicon of spent photovoltaic panels
Source: Royal Society of Chemistry journal article supplement (doi:10.1039/d5nj01063b), 2025-01-01
Supplement: d5nj01063b1.pdf [file d5nj01063b1.pdf]

## **Supplementary Material**

### **Recycling Co and Li from spent lithium-ion batteries with the silicon of spent photovoltaics panels**

Chuyang zhu <sup>a</sup>, Jiangxin Qiu <sup>c</sup>, Yikai Wang <sup>c</sup>, Yulin Min<sup>a,b</sup>, Yongsheng Liu <sup>c,\*</sup>,

Penghui Shi <sup>a,b,\*</sup>

<sup>a</sup> Shanghai Key Laboratory of Materials Protection and Advanced Materials in Electric Power, Shanghai University of Electric Power, Shanghai 200090, PR China

<sup>b</sup> Shanghai Institute of Pollution Control and Ecological Security, Shanghai 200090, PR China

<sup>c</sup> College of Mathematics and Physics, Shanghai University of Electric Power, 201306, China

\* Corresponding author. Tel.: +86 18801618059; E-mail addresses: shipenghui@shiep.edu.cn (P. Shi).

## **List of Texts, Figures and Tables**

Text S1. Wafer pre-processing and economic analysis

Fig. S1. Composition of  $\text{LiCoO}_2$  cathode materials after pretreatment

Fig. S2. Silicon powder obtained after simple treatment

Fig. S3. Schematic diagram of co-processing of decommissioned PV panels to recover valuable elements from spent cathode materials.

Fig. S4. Total mass loss diagram before and after reaction

Fig. S5. SEM image of the sample after ball milling

Fig. S6. (a-b) SEM images of cathode materials after direct baking; (c-f) SEM images of added silicon mediated baking

Fig. S7. (a) Lithium leaching rate at different roasting times; (b) Lithium leaching rate under different leaching conditions

Fig. S8. (a) Cost analysis of processing 1kg of spent  $\text{LiCoO}_2$  cathode powder, (b) Carbon emission analysis

Table S1. Percentage of O before and after roasting

Table S2. Percentage of Co before and after roasting

Table S3. Recovery of valuable metals by combined thermal and wet processes

Table S4. Economic cost comparison (\$/kg capacity)

Table S5. Comparison of carbon emissions ( $\text{kg CO}_2/\text{kg treatment}$ )

#### Text S1. Wafer pre-processing and economic analysis

The obtained wafers were first reacted in 18 wt.% HCl solution for 15 min to dissolve Al. After washing and drying, they were reacted in 30 wt.% HNO<sub>3</sub> solution at 50 °C for 10 min to dissolve Ag, and then further washed and dried. The resulting silicon wafer was crushed into powder to obtain silicon powder as shown in Fig. S2. Before and after the reaction, the Al peak disappeared, removing the effects of Al and Ag, and the pretreated silicon powder was obtained. Some studies have confirmed that the method can almost completely dissolve Al and Ag<sup>1</sup>, and for the time being, the cost of the low concentration of HCl and HNO<sub>3</sub> used is low, and the amount of dissolved Al and Ag accounted for a relatively small percentage (3%), and the dissolving solution can be reused, but also the by-products of AgNO<sub>3</sub> and AlCl<sub>3</sub> for the benefit. The pretreatment process has low energy consumption and low cost.

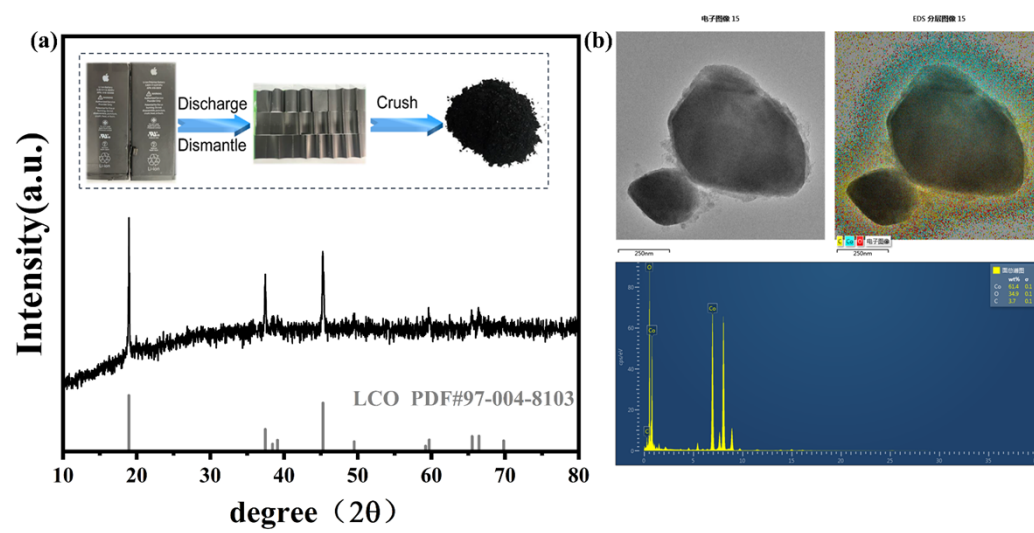

Fig. S1. Composition of  $\text{LiCoO}_2$  cathode materials after pretreatment

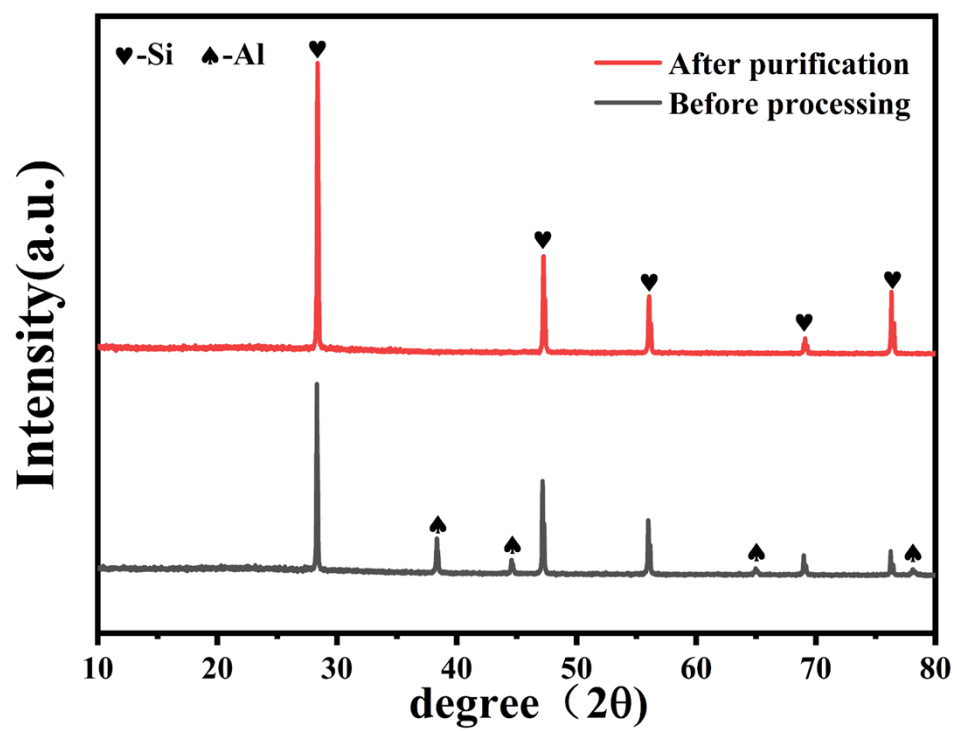

Fig. S2. Silicon powder obtained after simple treatment

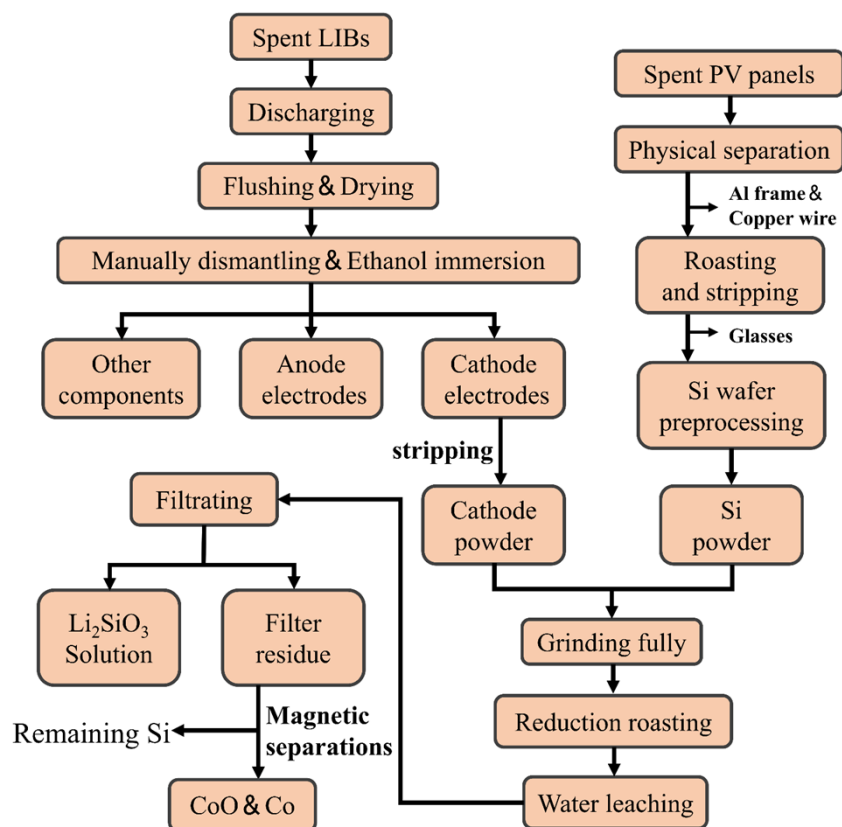

Fig.S3. Schematic diagram of co-processing of spent PV panels to recover valuable elements from waste cathode materials.

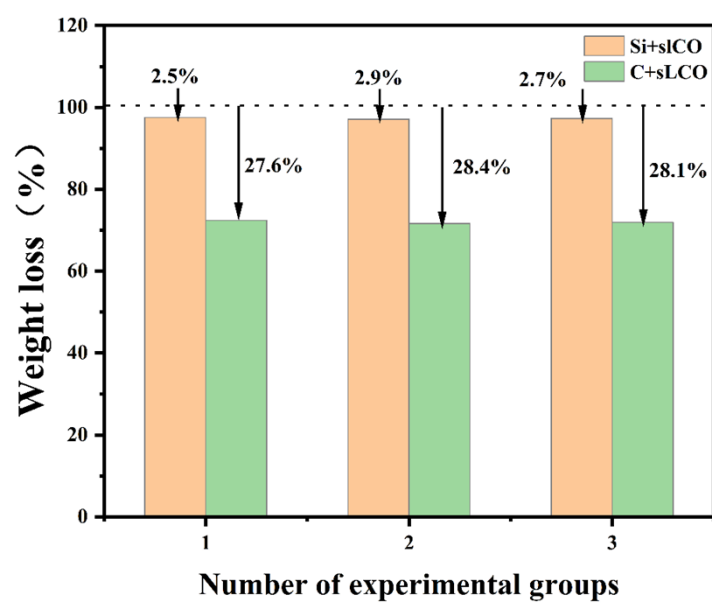

Fig. S4. Total mass loss diagram before and after reaction

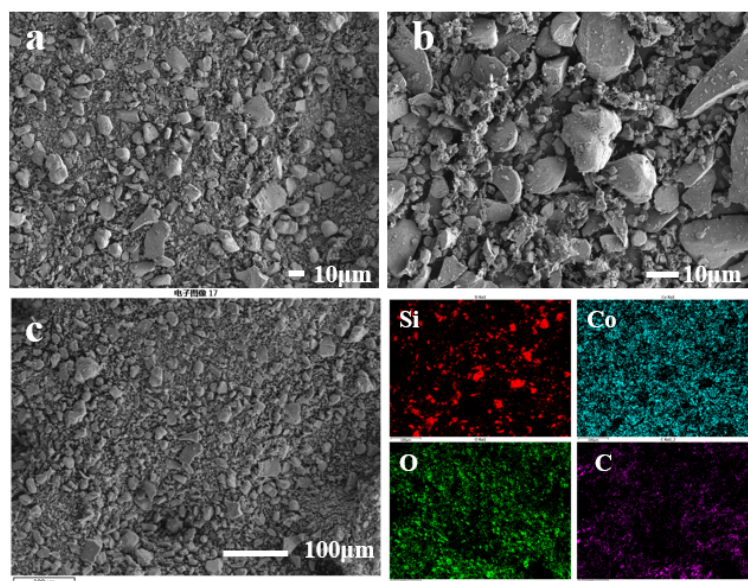

Fig. S5. SEM image of the sample after ball milling



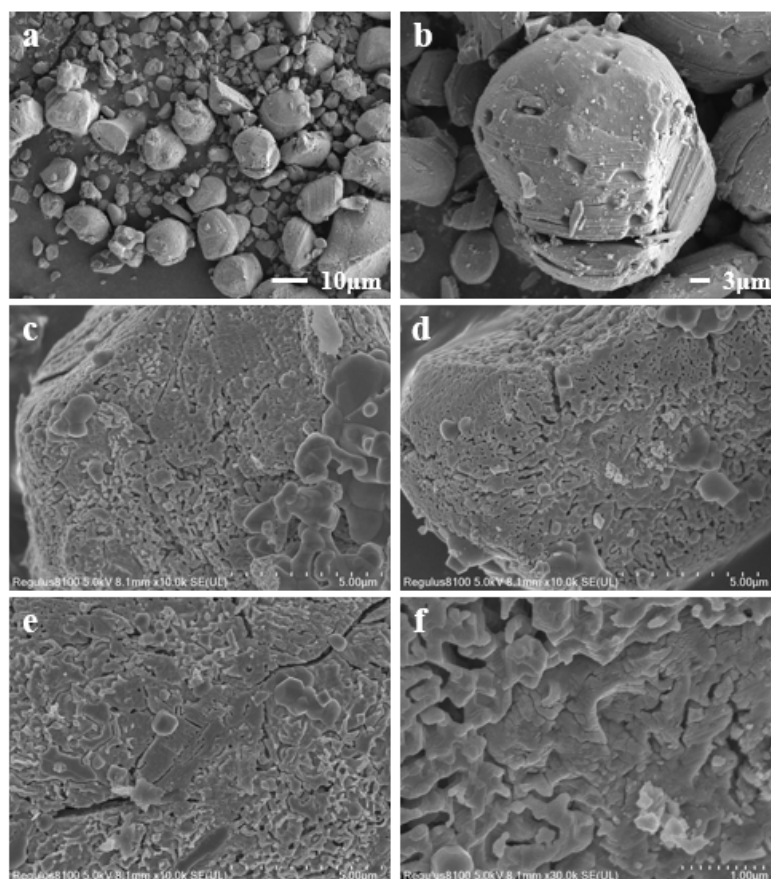

Fig. S6. (a-b) SEM images of cathode materials after direct baking; (c-f) SEM images of added silicon mediated baking

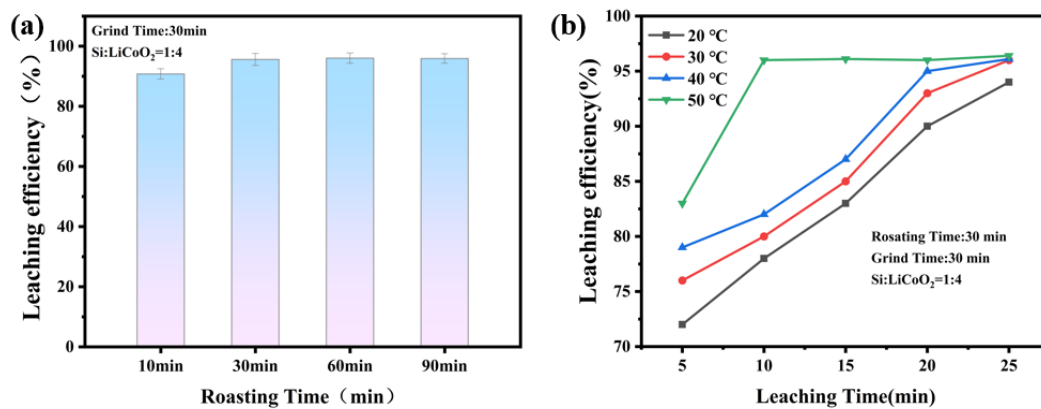

Fig. S7. (a) Lithium leaching rate at different roasting times; (b) Lithium leaching rate under different leaching condition

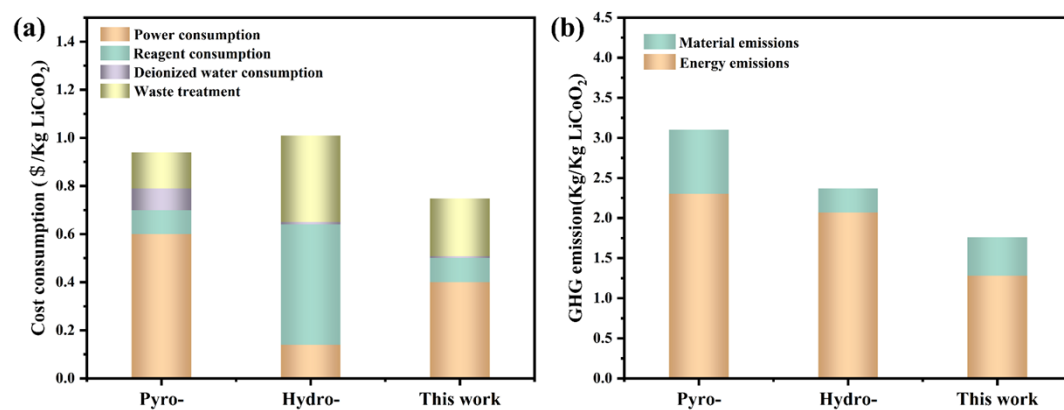

Fig. S8. (a) Cost analysis of processing 1kg of spent  $\text{LiCoO}_2$  cathode powder, (b) Carbon emission analysis

Table S1. Percentage of O before and after roasting

| O                 | Lattice oxygen | Adsorbed oxygen | Other oxygen |
|-------------------|----------------|-----------------|--------------|
| Cathode           | 29.58%         | 68.24%          | 11.33%       |
| Cathode-700 °C    | 50.88%         | 15.53%          | 39.59%       |
| Cathode+Si-700 °C | 19.54%         | 16.23%          | 49.07%       |

Table S2. Percentage of Co before and after roasting

| Co                | Co <sup>2+</sup> | Co <sup>3+</sup> |
|-------------------|------------------|------------------|
| Cathode           | 35.89%           | 64.11%           |
| Cathode-700 °C    | 40.79%           | 59.21%           |
| Cathode+Si-700 °C | 100%             | 0%               |

Table S3. Recovery of valuable metals by combined thermal and wet processes

| Recovery                                               | Leaching rate/% |       | Ref. |
|--------------------------------------------------------|-----------------|-------|------|
|                                                        | Li              | Co    |      |
| Biochar-assisted carbon reduction with water leaching  | 98              | 98.5  | 2    |
| Microwave-assisted hydrogen reduction plus leaching    | 98.17           | 98.52 | 3    |
| Diaphragm roasting plus leaching                       | 93.2            | -     | 4    |
| Urea-assisted ammonium sulphate roasting plus leaching | 94.94           | 95.47 | 5    |

Table S4. Economic cost comparison (\$/kg capacity)

| Type of cost                   | Pyrometallurgy                                                                                                              | Hydrometallurgy                                                        | This work                                                                                                                   |
|--------------------------------|-----------------------------------------------------------------------------------------------------------------------------|------------------------------------------------------------------------|-----------------------------------------------------------------------------------------------------------------------------|
| Power consumption              | Electricity consumption:<br>$2.5 \text{ kWh} \times 0.12 = 0.30$<br>Fuel consumption:<br>$15 \text{ MJ} \times 0.02 = 0.30$ | Electricity<br>consumption:<br>$1.2 \text{ kWh} \times 0.12 =$<br>0.14 | Electricity consumption:<br>$1.5 \text{ kWh} \times 0.12 = 0.18$<br>Fuel consumption:<br>$10 \text{ MJ} \times 0.02 = 0.20$ |
| Reagent consumption            | Acid consumption<br>$0.2 \text{ kg} \times 0.5 = 0.10$                                                                      | Acid consumption<br>$1.0 \text{ kg} \times 0.5 = 0.50$                 | Recycled silicon<br>$0.2 \text{ kg} \times 0.5 = 0.10$                                                                      |
| Deionized water<br>consumption | $9 \text{ L} \times 0.001 = 0.09$                                                                                           | $10 \text{ L} \times 0.001 =$<br>0.01                                  | $8 \text{ L} \times 0.001 = 0.008$                                                                                          |
| Waste treatment                | $0.5 \text{ kg} \times 0.3 = 0.15$                                                                                          | $1.2 \text{ kg} \times 0.3 = 0.36$                                     | $0.8 \text{ kg} \times 0.3 = 0.24$                                                                                          |
| Total cost (\$/kg)             | 0.94                                                                                                                        | 1.01                                                                   | 0.73                                                                                                                        |

Table S5. Comparison of carbon emissions (kg CO<sub>2</sub>/kg treatment)

| Sources of emissions                            | Pyrometallurgy                                          | Hydrometallurgy                                                                       | This work                                               |
|-------------------------------------------------|---------------------------------------------------------|---------------------------------------------------------------------------------------|---------------------------------------------------------|
| Energy emissions                                | High temperature consumption                            | Stirring, extraction<br>$1.2 \text{ kWh} \times 0.475 = 0.57$                         | Medium temperature consumption                          |
|                                                 | $2.5 \text{ kWh} \times 0.475 = 1.19$                   | Acid consumption<br>(H <sub>2</sub> SO <sub>4</sub> + H <sub>2</sub> O <sub>2</sub> ) | $1.5 \text{ kWh} \times 0.475 = 0.71$                   |
|                                                 | Fuel consumption<br>$15 \text{ MJ} \times 0.074 = 1.11$ | $1.5 \text{ kg} \times 1 = 1.5$                                                       | Fuel consumption<br>$10 \text{ MJ} \times 0.057 = 0.57$ |
| Material emissions                              | Direct process emissions (CO <sub>2</sub> )<br>0.8      | Chemical precipitation & extractant emissions<br>0.3                                  | Silicon recovery process<br>0.48                        |
| Total carbon emissions (kg CO <sub>2</sub> /kg) | 3.1                                                     | 2.37                                                                                  | 1.76                                                    |



## References :

1. X. Xu, D. Lai, W. Wang and Y. Wang, *Resour. Conserv. Recycl.*, 2022, **182**, 106284.
2. A. Vasamsetti, A. Ravitchandiran, S. P. Rajendra, M. S. AlSalhi, R. Rajaram and S. Angaiah, *J. Sustain. Metall.*, 2024, **10**, 1649-1664.
3. J. You, Z. Qin, G. Wang, M. Rao, J. Luo, Z. Peng, S. Zou and G. Li, *J. Clean. Prod.*, 2023, **428**, 139488.
4. J. Xiao, B. Niu and Z. Xu, *J. Hazard. Mater.*, 2021, **418**, 126319.
5. Y. Kong, Y. Duan, Y. Zhang, Y. Min, H. Lu and P. Shi, *New J. Chem.*, 2024, **48**, 13875-13884.
